# Supplementary material for: COVID-19 mortality is associated with pre-existing impaired innate immunity in health conditions
Source: PeerJ. 2022 May 6;10:e13227. doi: 10.7717/peerj.13227 (PMC9083528; doi:10.7717/peerj.13227)
Supplement: Supplemental Information 2 [file peerj-10-13227-s002.xlsx]

## Sheet: Suppl.Table.2
Supplementary Table 2. Risk factor genes that are involved in apoptosis, autophagy, and mitochondrial function
Functional Category	Gene Symbol	Correlation Test		Fold Change
		P Value	Coefficient	AD	Asthma	CAD	CKD	AH	COPD	Ethnicity	HIV	HT	Lupus	Obese	MS	RA	T2D
Mitochondrion Function	MTO1	0.00220427	-0.745604	0.99027	1	1	0.798913	0.960758	1	1	1	1	1	0.97459	0.76177	1	0.975425
	MOAP1	0.00256608	-0.738322	1	1	1	0.837839	1	1	1	0.98713	1	1	0.9742	0.872831	1	1
	ACADM	0.000994892	-0.780204	0.975465	1	1	0.764965	0.951897	1	1	1	1	1	1	0.887657	1.04252	1
	FBXW7	0.00166766	-0.758384	1	1	1	0.774044	1	1	1.11532	0.978602	1	1	1	0.741119	1.02485	1
	BNIP3	0.00439728	-0.7326	0.984641	1	1	0.853329	0.97111	0.975716	1	1	NA	1	1	0.771445	1.01995	1
	NDUFA5	0.00442527	-0.732256	NA	1	1	0.871104	0.974356	1	1	1.00804	1	1	1	0.820511	1.13164	1
	SUCLG2	0.00504236	-0.702965	0.990667	1	1	0.777378	1	1	1	1.01909	1	1	1	0.850307	1	1
	FLCN	0.0050901	0.702435	1	1	1	1.2111	1	1	1	1.0097	1	1	1.02226	1.31703	0.957906	1
	MTRF1	0.00530134	-0.700133	1	1	1	0.910937	1	0.984523	1	1	1	1	1	0.8592	1.03802	1
	UBE2J2	0.00587196	0.716391	1.0046	1	NA	1.31906	1.01931	1	1	0.988248	1	1	1	1.32525	0.989446	1
	TFB2M	0.00588109	-0.694164	0.984799	1	1	0.815359	1	1	1	1.02063	1	1	1	0.835741	1.03867	1.03881
	FAHD1	0.00633935	0.711913	1	1	NA	1.15752	1.03708	1	1	1.02427	1	1	1.03018	1.20672	1.02804	1
	PDE12	0.00694883	0.684276	1	1	1	1.16951	1.04226	1	1	1	1	1	0.960116	1.13344	1	0.951522
	SYNJ2BP	0.00728773	-0.681387	1	1	1	0.852372	0.942774	1	1	1.02062	1	1	1	0.854111	0.977966	1
	SFXN4	0.00827916	0.695662	1	0.966963	NA	1.1667	1.07621	1	1	0.976209	1	1	1	1.26054	0.965643	1
	PIN4	0.00886213	-0.669186	0.994348	1	1	0.902092	1	1	1	0.97969	1	1	1.02412	1	1.02129	0.97793
	MTERF2	0.0089179	-0.690952	1	1	NA	0.859356	1	0.967481	1	1.00531	1	1	0.978449	0.797014	1.0467	1
	STX17	0.00910516	-0.667455	1	1	1	0.864366	0.941201	1	1	1	1	1	0.957215	0.833914	1	1.04174
	LYRM7	0.00928346	-0.688371	1	1	NA	0.829789	0.94885	0.975543	1	1.0144	1	1	1	0.718288	1	0.909755
	LACTB2	0.00976646	-0.662921	0.995227	1	1	0.780434	1.08344	1	1	1	1	1	1	0.747628	1.05638	1
Autophagy	FBXW7	0.00166766	-0.758384	1	1	1	0.774044	1	1	1.11532	0.978602	1	1	1	0.741119	1.02485	1
	PLEKHM1	0.00174258	0.75642	1.01399	1	1	1.08244	1	1	1	1	1	1	1.01267	1.088	0.982811	1
	RAB7A	0.0022219	-0.745228	1	1	1	0.856444	1	1	1	0.973016	1	1	1	0.842414	1.01314	1.01562
	BNIP3	0.00439728	-0.7326	0.984641	1	1	0.853329	0.97111	0.975716	1	1	NA	1	1	0.771445	1.01995	1
	FLCN	0.0050901	0.702435	1	1	1	1.2111	1	1	1	1.0097	1	1	1.02226	1.31703	0.957906	1
	UBQLN2	0.00579684	-0.695002	1	1	1	0.852637	1	1	1	1.02656	1	1	1	0.870368	1.04008	1
	STX17	0.00910516	-0.667455	1	1	1	0.864366	0.941201	1	1	1	1	1	0.957215	0.833914	1	1.04174
Apoptosis	FBXW7	0.00166766	-0.758384	1	1	1	0.774044	1	1	1.11532	0.978602	1	1	1	0.741119	1.02485	1
	EBAG9	0.00172032	-0.756996	0.978256	1	1	0.856012	0.964273	1	1	0.988324	1	1	1	0.787698	1.02223	1
	MOAP1	0.00256608	-0.738322	1	1	1	0.837839	1	1	1	0.98713	1	1	0.9742	0.872831	1	1
	BNIP3	0.00439728	-0.7326	0.984641	1	1	0.853329	0.97111	0.975716	1	1	NA	1	1	0.771445	1.01995	1
	TRIM39	0.00469537	-0.729018	1.0037	1	NA	0.931094	1	0.986258	1	0.979101	1	1	1	0.906829	1	1
	DFFB	0.00489486	-0.70463	1	1	1	0.819647	1	1	1	1.00735	1	1	0.974954	0.860043	1	1
	FLCN	0.0050901	0.702435	1	1	1	1.2111	1	1	1	1.0097	1	1	1.02226	1.31703	0.957906	1
	JMY	0.00603337	-0.714815	1	1	NA	0.784939	0.914419	0.986343	1	1.03167	1	1	1	0.779111	1.02693	1
